# Supplementary material for: Longer polyenyl cations in relation to soliton theory
Source: Royal Society of Chemistry journal article supplement (doi:10.1039/b706212e), 2007-01-01

## Electronic Supplementary Information

Olefinic region of  $^1\text{H}$  NMR spectra (500 MHz) for

a)  $\beta,\beta$ -carotene ( $\text{C}_{40}$ ) in 0.5 mL  $\text{CDCl}_3$  with 10  $\mu\text{L}$   $\text{CF}_3\text{COOD}$  added, at  $-15\text{ }^\circ\text{C}$ .

b) Decapreno- $\beta$ -carotene ( $\text{C}_{50}$ ), same conditions as a).

c) Dodecapreno- $\beta$ -carotene ( $\text{C}_{60}$ ) in 0.5 mL  $\text{CD}_2\text{Cl}_2$  with 10  $\mu\text{L}$   $\text{CF}_3\text{COOD}$  added, at  $-5\text{ }^\circ\text{C}$ .

a)

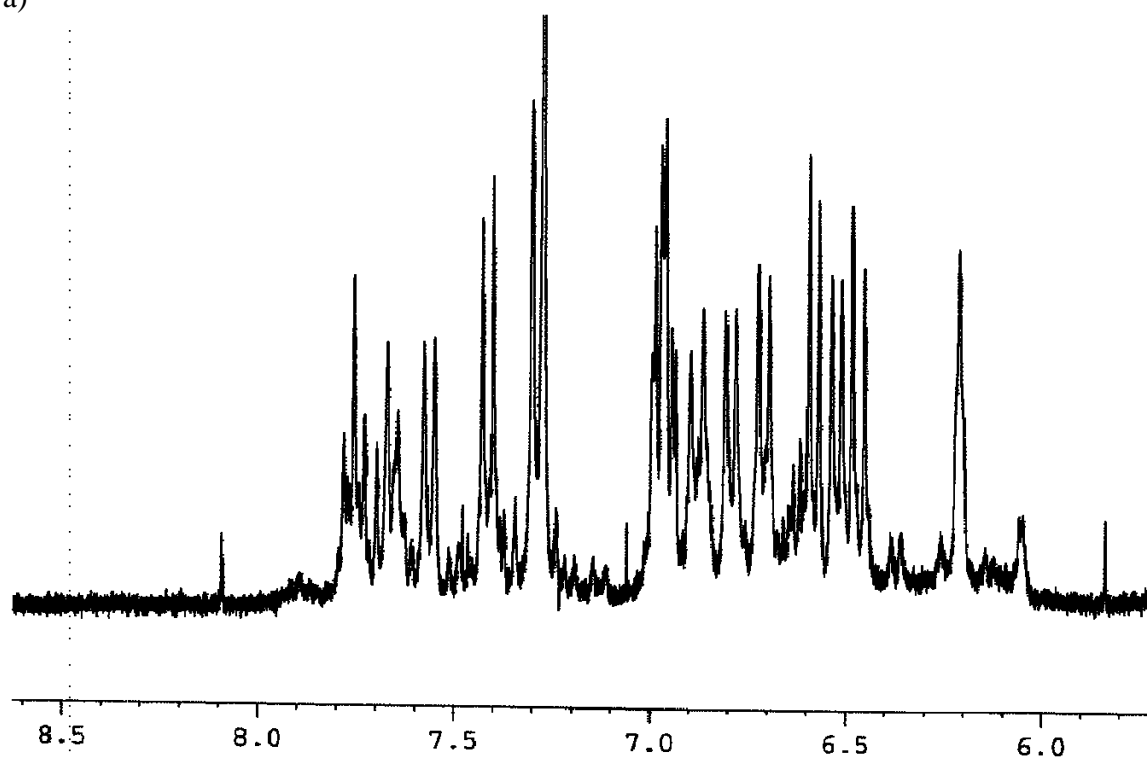

b)

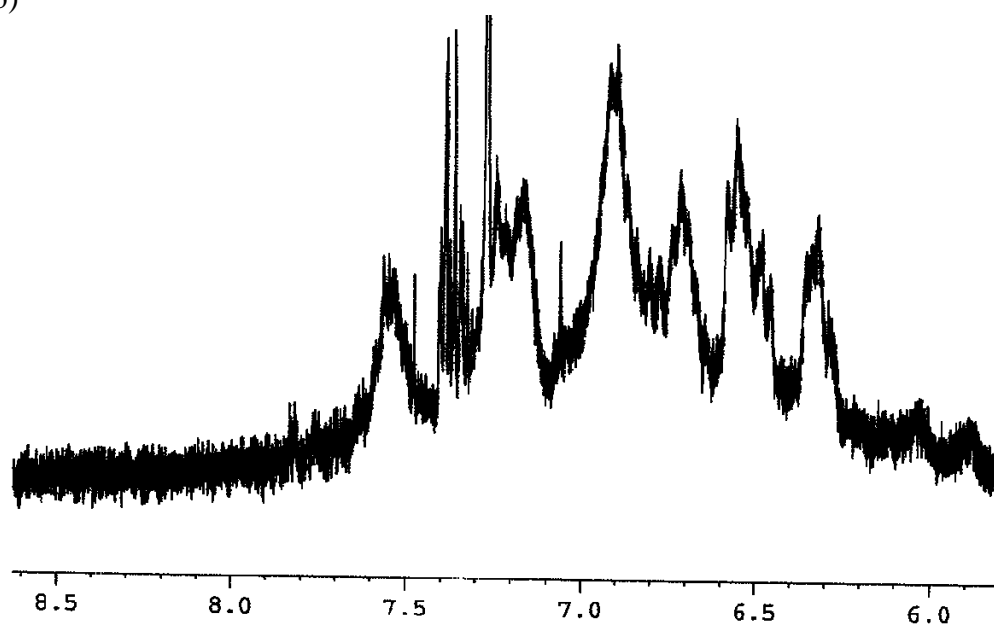

c)

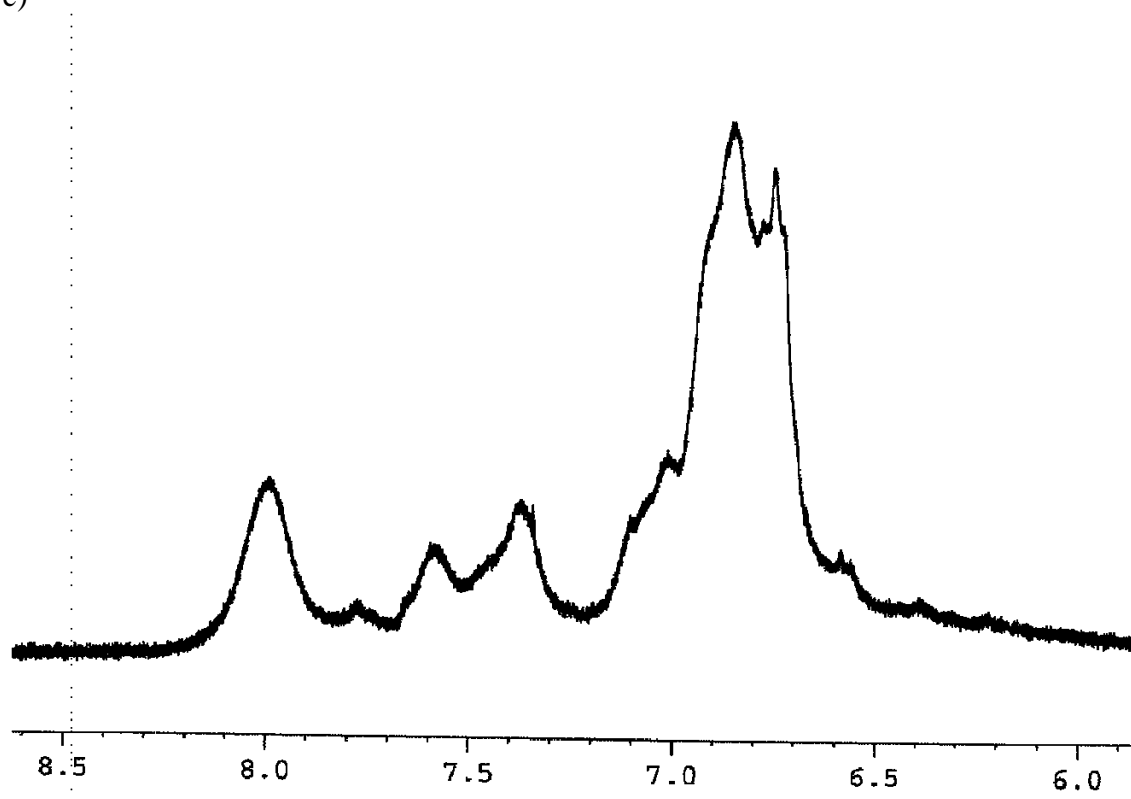

Supplement: b706212e.pdf [file b706212e.pdf]
